# Supplementary material for: Synthesis and anticonvulsant activity of phenoxyacetyl derivatives of amines, including aminoalkanols and amino acids
Source: Royal Society of Chemistry journal article supplement (doi:10.1039/c8md00430g), 2018-01-01
Supplement: c8md00430g1.pdf [file c8md00430g1.pdf]

## Synthesis and anticonvulsant activity of phenoxyacetyl derivatives of amines, including aminoalkanols and amino acids

Katarzyna Pańczyk<sup>a\*</sup>, Dorota Żelaszczyk<sup>a</sup>, Paulina Koczurkiewicz<sup>b</sup>, Karolina Słoczyńska<sup>b</sup>, Elżbieta Pękala<sup>b</sup>, Ewa Żesławska<sup>c</sup>, Wojciech Nitek<sup>d</sup>, Paweł Żmudzki<sup>e</sup>, Henryk Marona<sup>a</sup>, Anna Waszkielewicz<sup>a</sup>

<sup>a</sup> Department of Bioorganic Chemistry, Chair of Organic Chemistry, Faculty of Pharmacy, Jagiellonian University Medical College, Medyczna 9, 30-688 Cracow, Poland

<sup>b</sup> Department of Pharmaceutical Biochemistry, Faculty of Pharmacy, Jagiellonian University Medical College, Medyczna 9, 30-688 Cracow, Poland

<sup>c</sup> Department of Chemistry, Institute of Biology, Pedagogical University, Podchorążych 2, 30-084 Cracow, Poland

<sup>d</sup> Faculty of Chemistry, Jagiellonian University, Gronostajowa 2, 30-387 Cracow, Poland

<sup>e</sup> Department of Medicinal Chemistry, Faculty of Pharmacy, Jagiellonian University Medical College, Medyczna 9, 30-688 Cracow, Poland

\*corresponding author: Katarzyna Pańczyk, e-mail: [katarzyna.panczyk@uj.edu.pl](mailto:katarzyna.panczyk@uj.edu.pl)

**Table 1**

Physicochemical parameters calculated for compounds **1-17** by means of molinspiration online toolkit (<http://www.molinspiration.com/cgi-bin/properties>)

| Compd     | MW     | logP | nON | nOHNH | nrotb | TPSA (Å <sup>2</sup> ) |
|-----------|--------|------|-----|-------|-------|------------------------|
| <b>1</b>  | 277.36 | 2.19 | 4   | 2     | 4     | 58.56                  |
| <b>2</b>  | 283.37 | 3.71 | 3   | 1     | 6     | 38.33                  |
| <b>3</b>  | 299.37 | 2.71 | 4   | 2     | 6     | 58.56                  |
| <b>4</b>  | 237.30 | 1.63 | 4   | 2     | 5     | 58.56                  |
| <b>5</b>  | 237.30 | 1.60 | 4   | 2     | 5     | 58.56                  |
| <b>6</b>  | 237.30 | 1.60 | 4   | 2     | 5     | 58.56                  |
| <b>7</b>  | 237.30 | 1.60 | 4   | 2     | 5     | 58.56                  |
| <b>8</b>  | 251.28 | 0.02 | 5   | 2     | 5     | 75.63                  |
| <b>9</b>  | 251.28 | 0.02 | 5   | 2     | 5     | 75.63                  |
| <b>10</b> | 250.30 | 1.52 | 5   | 3     | 5     | 81.43                  |
| <b>11</b> | 264.32 | 1.34 | 5   | 2     | 5     | 67.43                  |
| <b>12</b> | 251.33 | 2.13 | 4   | 2     | 6     | 58.56                  |
| <b>13</b> | 251.33 | 2.13 | 4   | 2     | 6     | 58.56                  |
| <b>14</b> | 439.55 | 5.17 | 6   | 1     | 9     | 73.87                  |
| <b>15</b> | 265.35 | 2.54 | 4   | 2     | 6     | 58.56                  |
| <b>16</b> | 313.40 | 3.12 | 4   | 2     | 6     | 58.56                  |

**Table 2**

Anticonvulsant activity in 6 Hz and neurotoxicity in rotarod of compounds **6** and **8** (mice, *i.p.*).

| Compd    | Dose<br>[mg/kg] | Time [h] |     |     |     |     |
|----------|-----------------|----------|-----|-----|-----|-----|
|          |                 | 0.25     | 0.5 | 1.0 | 2.0 | 4.0 |
| <b>6</b> | 120             | 2/4      | 0/4 | 0/4 | 0/4 | 0/4 |
| <b>8</b> | 100             | 0/4      | 0/4 | 1/4 | 0/4 | 1/4 |

Number of animals protected / number of animals tested

**Table 3**

Results of preliminary hippocampal kindling screen for compound **6** in rats, *i.p.*

| Compd    | Dose<br>[mg/kg] | Time<br>[h] | Seizure Score |   | Afterdischarge<br>duration [s] |       |    |
|----------|-----------------|-------------|---------------|---|--------------------------------|-------|----|
|          |                 |             | Rat #1        | 5 | 5 <sup>a</sup>                 | 58-69 | 54 |
| <b>6</b> | 100             | 0.25        | Rat #2        | 5 | 1 <sup>a</sup>                 | 51-70 | 22 |

Seizures are scored according to the following criteria (Racine's scale): stage 1—mouth and facial clonus; stage 2—stage 1 plus head nodding; stage 3—stage 2 plus forelimb clonus; stage 4—stage 3 plus rearing; stage 5—stage 4 plus repeated rearing and falling

<sup>a</sup> significantly different from control

**Table 4**

Mutagenic activity tested with the Ames test on TA100 and TA1535 strains in the absence and in the presence of metabolic activation.

| Compd                   | Concentration<br>(µg/plate) | Number of revertants  |               |             |              |
|-------------------------|-----------------------------|-----------------------|---------------|-------------|--------------|
|                         |                             | <i>S. typhimurium</i> |               |             |              |
|                         |                             | TA100                 |               | TA1535      |              |
|                         |                             | -S9                   | +S9           | -S9         | +S9          |
|                         |                             | Mean ± S.D.           | Mean ± S.D.   | Mean ± S.D. | Mean ± S.D.  |
|                         |                             | (MI)                  | (MI)          | (MI)        | (MI)         |
| <b>Negative control</b> | -                           | 114 ± 18              | 130 ± 12      | 6 ± 2       | 18 ± 5       |
| <b>Positive control</b> | 5                           | 1366 ± 51             | 858 ± 29      | 306 ± 17    | 371 ± 33     |
| <b>3</b>                | 500                         | 154 ± 4 (1.4)         | 148 ± 8 (1.1) | 9 ± 0 (1.5) | 21 ± 6 (1.2) |
|                         | 250                         | 150 ± 7 (1.3)         | 147 ± 8 (1.1) | 8 ± 6 (1.3) | 22 ± 8 (1.2) |
|                         | 100                         | 83 ± 21 (0.7)         | 148 ± 4 (1.1) | 9 ± 2 (1.5) | 18 ± 7 (1.0) |

|           |     |                |                |              |              |
|-----------|-----|----------------|----------------|--------------|--------------|
|           | 50  | 98 ± 8 (0.9)   | 121 ± 16 (0.9) | 10 ± 6 (1.7) | 19 ± 4 (1.1) |
| <b>6</b>  | 500 | 130 ± 2 (1.1)  | 162 ± 14 (1.3) | 6 ± 2 (1.0)  | 23 ± 3 (1.3) |
|           | 250 | 112 ± 10 (1.0) | 140 ± 3 (1.1)  | 7 ± 1 (1.2)  | 24 ± 6 (1.3) |
|           | 100 | 112 ± 2 (1.0)  | 133 ± 12 (1.0) | 5 ± 1 (0.8)  | 21 ± 3 (1.2) |
|           | 50  | 100 ± 3 (0.9)  | 123 ± 18 (1.0) | 8 ± 2 (1.3)  | 19 ± 1 (1.1) |
|           |     |                |                |              |              |
| <b>12</b> | 500 | 109 ± 14 (1.0) | 176 ± 20 (1.4) | 5 ± 1 (0.8)  | 25 ± 9 (1.4) |
|           | 250 | 77 ± 7 (0.7)   | 163 ± 39 (1.3) | 7 ± 2 (1.2)  | 22 ± 2 (1.2) |
|           | 100 | 134 ± 13 (1.2) | 157 ± 10 (1.2) | 7 ± 2 (1.2)  | 26 ± 4 (1.4) |
|           | 50  | 160 ± 4 (1.4)  | 117 ± 6 (0.9)  | 6 ± 0 (1.0)  | 23 ± 4 (1.3) |
|           |     |                |                |              |              |
| <b>13</b> | 500 | 147 ± 17 (1.3) | 128 ± 11 (1.0) | 8 ± 2 (1.3)  | 25 ± 2 (1.4) |
|           | 250 | 110 ± 11 (1.0) | 112 ± 14 (0.9) | 8 ± 5 (1.3)  | 21 ± 8 (1.2) |
|           | 100 | 156 ± 8 (1.4)  | 154 ± 12 (1.2) | 9 ± 10 (1.5) | 20 ± 4 (1.1) |
|           | 50  | 110 ± 9 (1.0)  | 136 ± 8 (1.1)  | 5 ± 2 (0.8)  | 21 ± 6 (1.2) |
|           |     |                |                |              |              |

\* Mean ± S.D. - mean value ± standard deviation; mutagenicity index (MI, in brackets); Negative control – dimethylsulfoxide (DMSO); Positive control - sodium azide (NaN<sub>3</sub>, 5 µg/plate) in the absence of S9; 2-aminoanthracene (2AA, 5 µg/plate) in the presence of S9.

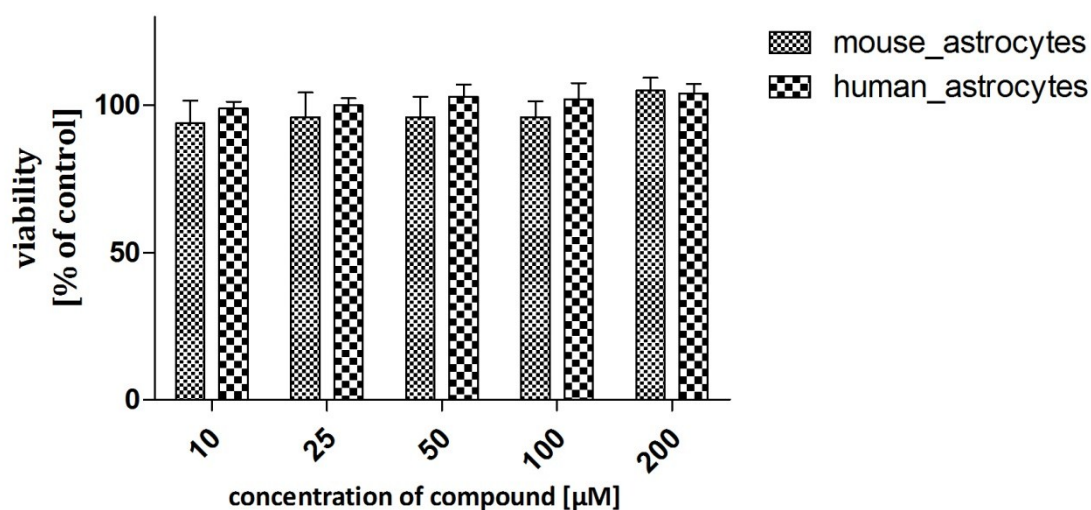

**Figure 1.** Effect of compound **6** on viability of human astrocytes and mouse astrocytes. Cells were cultured in medium supplemented with 10% FBS and antibiotics in the presence or absence (control) of compound (10, 25, 50, 100 or 200 µM). After 24 hour incubation MTT assay were performed. Results

from MTT assay are presented as percent of living cells compared to control. Values represent means  $\pm$  SEM of three independent experiments.

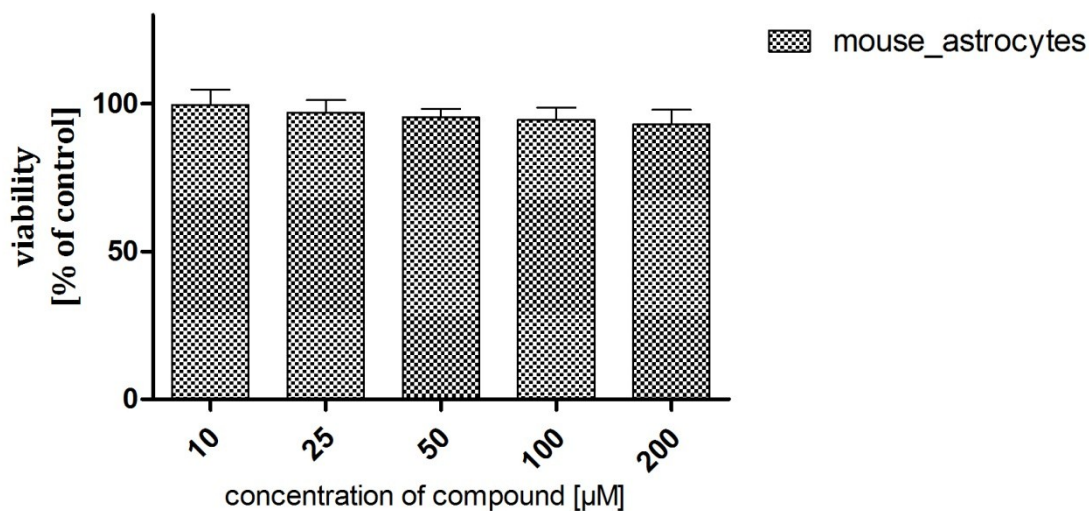

**Figure 2.** Effect of compound 6 on viability of mouse astrocytes. Cells were cultured in medium supplemented with 10% FBS and antibiotics in the presence or absence (control) of compound (10, 25, 50, 100 or 200  $\mu$ M). After 24 hour incubation neutral red (NR) assay were performed. Results from NR assay are presented as percent of living cells in compare to control. Values represent means  $\pm$  SEM of three independent experiments.

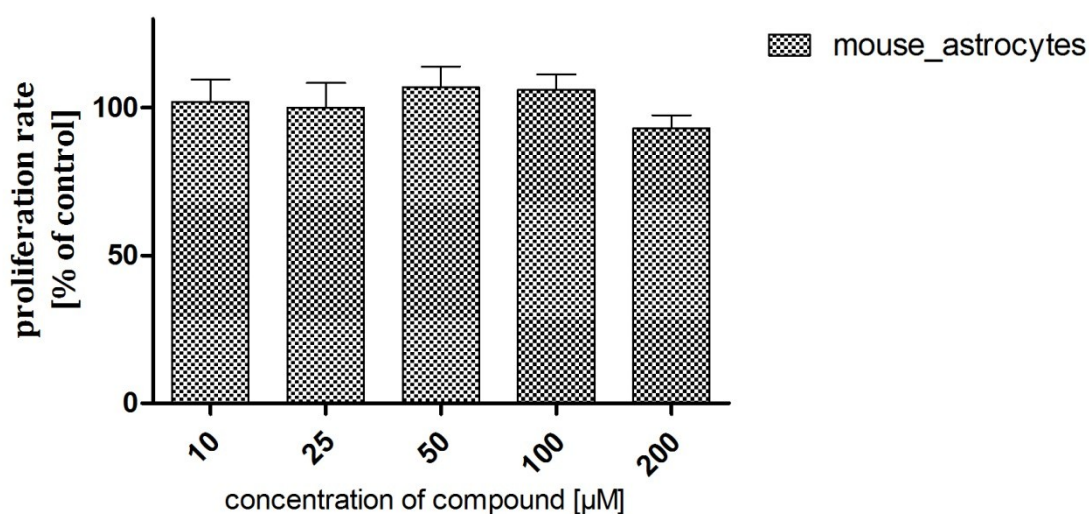

**Figure 3.** Effect of compound 6 on mouse astrocytes proliferation. Cells were cultured in medium supplemented with 10% FBS and antibiotics in the presence or absence (control) of compound (10, 25,

50, 100 or 200  $\mu\text{M}$ ). After 24 hour incubation crystal violet (CV) assay was performed. Results from CV assay are presented as number of proliferating cells in compare to control. Values represent means  $\pm$  SEM of three independent experiments.
